# Supplementary material
Source: PubMed Central journal article supplement (PMC5083138)
Supplement: NIHMS798256-supplement-2.pdf [file NIHMS798256-supplement-2.pdf]

**Supplementary Table 1. Differentially expressed genes in the CA1 of the hippocampus between control and Hdac3 cKO mice**

| Gene          | Locus                     | Expression (a.u.) |           | Fold change (log2) | p value    |
|---------------|---------------------------|-------------------|-----------|--------------------|------------|
|               |                           | Control           | Hdac3 cKO |                    |            |
| Gm9047        | chr6:29421436-29423429    | 0.253377          | 0         | -1.79769e+308      | 0.0307299  |
| Neurog2       | chr3:127336062-127338549  | 0.130821          | 0         | -1.79769e+308      | 0.00742109 |
| Olf1128       | chr2:87384763-87385699    | 0.173502          | 0         | -1.79769e+308      | 0.0257747  |
| Slco1b2       | chr6:141578038-141635156  | 0.0480124         | 0         | -1.79769e+308      | 0.0266557  |
| Ttll10        | chr4:155408945-155424926  | 0.0526758         | 0         | -1.79769e+308      | 0.030758   |
| G530011O06Rik | chrX:166123178-166428729  | 24.7911           | 1.63959   | -3.91841           | 0          |
| Stbd1         | chr5:93032076-93035605    | 1.13386           | 0.126729  | -3.16142           | 5.93E-07   |
| 4930564K09Rik | chr3:82680626-82747560    | 0.50806           | 0.0680669 | -2.89997           | 3.12E-05   |
| Apol10b       | chr15:77414587-77426555   | 0.179057          | 0.0258848 | -2.79024           | 0.0307421  |
| Col6a4        | chr9:105892648-105999022  | 0.136642          | 0.021694  | -2.65503           | 0.0003928  |
| Gm13483       | chr2:50152329-50289487    | 1.53687           | 0.321792  | -2.2558            | 0.0163718  |
| H2-Aa         | chr17:34419695-34424716   | 0.370856          | 0.084519  | -2.13351           | 0.0497275  |
| Adcyap1       | chr17:93598761-93604829   | 0.847596          | 0.209724  | -2.01489           | 0.00052621 |
| Svep1         | chr4:58055667-58219468    | 0.2211            | 0.0593402 | -1.89762           | 6.85E-05   |
| Gbp4          | chr5:105544785-105568571  | 0.987096          | 0.266411  | -1.88954           | 2.62E-06   |
| Wnt2          | chr6:17938939-17980445    | 2.05363           | 0.583824  | -1.81457           | 6.01E-06   |
| Grem1         | chr2:113588831-113598805  | 1.63309           | 0.474395  | -1.78344           | 0.00016425 |
| Iigp1         | chr18:60535682-60552283   | 0.453673          | 0.13275   | -1.77294           | 0.0117275  |
| Gm12250       | chr11:57997344-58003700   | 0.371471          | 0.119099  | -1.64108           | 0.0139637  |
| Plcz1         | chr6:139938242-139989938  | 0.502678          | 0.16758   | -1.58479           | 0.0135234  |
| Cyp26b1       | chr6:84521407-84543902    | 1.42464           | 0.479889  | -1.56983           | 2.55E-06   |
| B4galnt3      | chr6:120153827-120244577  | 0.27536           | 0.0950562 | -1.53447           | 0.0210999  |
| Gm606         | chr16:26957320-26990060   | 0.156468          | 0.0542668 | -1.52773           | 0.0444235  |
| Igtp          | chr11:58013057-58021094   | 0.931314          | 0.330901  | -1.49287           | 0.00284438 |
| Npsr1         | chr9:23902461-24120842    | 0.424882          | 0.153465  | -1.46915           | 0.00567113 |
| Ptch2         | chr4:116768960-116787436  | 0.172615          | 0.0647314 | -1.41502           | 0.0495407  |
| Cd74          | chr18:60963502-60972306   | 1.17259           | 0.440184  | -1.41352           | 0.0497352  |
| Xdh           | chr17:74233247-74299522   | 1.51275           | 0.589949  | -1.35851           | 1.76E-05   |
| 1700007F19Rik | chr3:57945628-57967729    | 2.29353           | 0.902122  | -1.34618           | 0.00087505 |
| Rsl1          | chr13:67274117-67284434   | 0.451626          | 0.178467  | -1.33947           | 0.0370869  |
| Cldn1         | chr16:26356731-26371925   | 0.314598          | 0.130039  | -1.27457           | 0.0407326  |
| Ano5          | chr7:58766398-58854079    | 0.339917          | 0.141138  | -1.26808           | 0.00382654 |
| Stac          | chr9:111463937-111592720  | 1.44375           | 0.617595  | -1.22509           | 0.00158342 |
| Nlrc5         | chr8:96996662-97051172    | 0.152742          | 0.0654019 | -1.22369           | 0.0348794  |
| Alox12b       | chr11:68970573-68983293   | 1.26432           | 0.588097  | -1.10424           | 0.00731421 |
| Spink8        | chr9:109719140-109729141  | 19.3652           | 9.09984   | -1.08955           | 7.75E-05   |
| Gbp2          | chr3:142283626-142300972  | 1.00418           | 0.47365   | -1.08412           | 0.0137881  |
| Htr1f         | chr16:64924554-65105610   | 1.37296           | 0.650001  | -1.07877           | 0.006681   |
| Wfs1          | chr5:37357342-37380221    | 14.4793           | 6.95251   | -1.05839           | 7.95E-08   |
| Gbp3          | chr3:142223015-142236176  | 1.10073           | 0.528941  | -1.05728           | 0.010212   |
| Doc2b         | chr11:75582591-75609559   | 7.08362           | 3.4245    | -1.0486            | 6.84E-07   |
| Htr5b         | chr1:123406349-123425042  | 1.68437           | 0.81884   | -1.04056           | 0.00995313 |
| Ryr1          | chr7:29788358-29910170    | 1.29764           | 0.633824  | -1.03373           | 7.95E-06   |
| Gm12824       | chr4:114079328-114287703  | 0.210467          | 0.102919  | -1.03208           | 0.0406832  |
| Nts           | chr10:101944389-101953052 | 3.50322           | 1.73016   | -1.01778           | 0.00772354 |
| H2-K1         | chr17:34132956-34137278   | 4.37543           | 2.16594   | -1.01443           | 0.00108162 |
| Ly6a          | chr15:74825306-74828318   | 9.16689           | 4.63849   | -0.982776          | 0.00182951 |

|          |                           |          |          |           |            |
|----------|---------------------------|----------|----------|-----------|------------|
| Ccnd1    | chr7:152115835-152125830  | 5.72179  | 2.89834  | -0.981238 | 1.21E-05   |
| Hunk     | chr16:90386641-90499798   | 5.42041  | 2.76234  | -0.972514 | 5.01E-06   |
| Kl       | chr5:151755181-151796392  | 2.37679  | 1.22269  | -0.958962 | 0.00025319 |
| Myoc     | chr1:164569280-164588350  | 2.27554  | 1.17281  | -0.956233 | 0.00476512 |
| Cntnap5b | chr1:101669341-102382519  | 3.12769  | 1.63528  | -0.935558 | 0.00010527 |
| Ccdc37   | chr6:90353729-90378474    | 3.15532  | 1.64975  | -0.935537 | 0.00264658 |
| Mc4r     | chr18:67017361-67020126   | 1.70306  | 0.894332 | -0.929245 | 0.00769164 |
| Plin4    | chr17:56219079-56249225   | 3.51643  | 1.85335  | -0.923976 | 0.00573505 |
| Arl4d    | chr11:101526854-101529146 | 3.88418  | 2.07596  | -0.903829 | 0.00663193 |
| Cpne9    | chr6:113232300-113255565  | 1.19932  | 0.644123 | -0.896807 | 0.020203   |
| Arc      | chr15:74499512-74503000   | 31.2118  | 16.8685  | -0.887759 | 1.85E-06   |
| Glt8d2   | chr10:82092582-82153395   | 3.25088  | 1.77001  | -0.877074 | 0.0368844  |
| Krt12    | chr11:99276977-99283573   | 1.48121  | 0.8105   | -0.869889 | 0.034773   |
| Ndst4    | chr3:125107008-125427904  | 7.23094  | 3.96734  | -0.866009 | 6.03E-05   |
| Fos      | chr12:86814850-86818219   | 2.91176  | 1.60561  | -0.858774 | 0.0065798  |
| Chrna5   | chr9:54828686-54855586    | 1.41323  | 0.781255 | -0.855133 | 0.0197225  |
| Cntnap5c | chr17:57908992-58549765   | 4.90806  | 2.71592  | -0.853714 | 0.00015297 |
| H2-D1    | chr17:35400038-35462354   | 3.1425   | 1.73905  | -0.853616 | 0.00899753 |
| Metrn1   | chr11:121563740-121578703 | 1.06892  | 0.597816 | -0.83838  | 0.040329   |
| Unc13c   | chr9:73327230-73781374    | 1.4118   | 0.799996 | -0.819474 | 0.00174402 |
| Dsp      | chr13:38243162-38290446   | 2.04039  | 1.16466  | -0.808932 | 0.0003885  |
| Ddit4l   | chr3:137286635-137291296  | 1.21783  | 0.695287 | -0.808636 | 0.0338086  |
| Ucp2     | chr7:107641853-107650682  | 1.23301  | 0.705549 | -0.80537  | 0.0114356  |
| Drd5     | chr5:38710747-38713549    | 3.39087  | 1.94037  | -0.805323 | 0.00314213 |
| Cntn4    | chr6:105627738-106649299  | 4.388    | 2.51104  | -0.80528  | 0.00654208 |
| Lypd1    | chr1:127573572-127808791  | 13.4008  | 7.68325  | -0.802535 | 0.00019948 |
| Prkcd    | chr14:31408539-31439394   | 3.85284  | 2.21218  | -0.800454 | 0.00314223 |
| Htr1a    | chr13:106233772-106238213 | 5.41936  | 3.13294  | -0.790607 | 0.00032772 |
| Cdhr1    | chr14:37891034-37911497   | 0.924718 | 0.535212 | -0.788902 | 0.0233072  |
| Ramp2    | chr11:101107647-101109564 | 8.68341  | 5.05041  | -0.781861 | 0.0117994  |
| Irgm1    | chr11:48678750-48684848   | 2.16954  | 1.26709  | -0.77587  | 0.0202803  |
| Lpl      | chr8:71404453-71430831    | 4.5933   | 2.69988  | -0.766636 | 0.00081479 |
| Arrdc2   | chr8:73359036-73363619    | 3.88638  | 2.29154  | -0.76211  | 0.0058822  |
| Tpd52l1  | chr10:31052185-31165727   | 3.71468  | 2.23563  | -0.732554 | 0.0377279  |
| Ism1     | chr2:139503913-139584317  | 1.40096  | 0.844165 | -0.730817 | 0.0375936  |
| Dusp5    | chr19:53603807-53615812   | 7.35032  | 4.44581  | -0.72536  | 0.0139052  |
| Rprl3    | chr8:3803124-3803361      | 562.71   | 340.479  | -0.724826 | 0.00639217 |
| Nr4a1    | chr15:101097276-101105225 | 8.77692  | 5.32833  | -0.720031 | 0.00105124 |
| Alad     | chr4:62170203-62181097    | 6.48828  | 3.94001  | -0.719635 | 0.0109098  |
| Plekhg1  | chr10:6379238-6606164     | 1.93939  | 1.18107  | -0.71551  | 0.0218547  |
| Htr2a    | chr14:75040646-75106666   | 2.52894  | 1.54471  | -0.711199 | 0.0150959  |
| Cd34     | chr1:196765014-196803153  | 7.35989  | 4.49707  | -0.710698 | 0.014615   |
| Slc17a6  | chr7:58877199-58926496    | 3.61301  | 2.21373  | -0.706723 | 0.00315407 |
| Klhl13   | chrX:22796396-22942179    | 5.26105  | 3.24393  | -0.697609 | 0.00291635 |
| Itga7    | chr10:128370868-128398044 | 4.5953   | 2.8353   | -0.696656 | 0.00244998 |
| Tmem158  | chr9:123168174-123169907  | 9.65419  | 5.96576  | -0.694448 | 0.00445626 |
| Cdh24    | chr14:55250828-55260201   | 2.30446  | 1.42928  | -0.689141 | 0.0218264  |
| Olfml2b  | chr1:172574662-172612920  | 6.23851  | 3.88951  | -0.681613 | 0.00219503 |
| Neurod6  | chr6:55627812-55631257    | 34.5016  | 21.5528  | -0.678786 | 0.00029882 |
| Amigo2   | chr15:97074504-97216122   | 4.84123  | 3.03425  | -0.674036 | 0.0182946  |
| B2m      | chr2:121945843-122011925  | 25.6083  | 16.0551  | -0.67358  | 0.00349208 |
| Cd109    | chr9:78463352-78564067    | 0.761383 | 0.478202 | -0.671003 | 0.0495962  |

|               |                           |          |          |           |            |
|---------------|---------------------------|----------|----------|-----------|------------|
| Pcdh20        | chr14:88864553-88871203   | 15.0586  | 9.46374  | -0.670109 | 0.00033422 |
| Trib1         | chr15:59480208-59488654   | 1.1126   | 0.699398 | -0.669746 | 0.0469164  |
| Nbl1          | chr4:138638206-138648885  | 10.4642  | 6.58743  | -0.66767  | 0.00296967 |
| Sgk1          | chr10:21601989-21719708   | 22.0591  | 13.9303  | -0.663143 | 0.00461297 |
| Thbs4         | chr13:93521540-93564773   | 1.92617  | 1.21834  | -0.660824 | 0.0274636  |
| Fam40b        | chr6:29867012-29909680    | 6.63448  | 4.19811  | -0.660243 | 0.00085053 |
| Fam84b        | chr15:60650550-60662955   | 1.65788  | 1.04931  | -0.659896 | 0.0230856  |
| Nptx2         | chr5:145306755-145318347  | 6.1523   | 3.89873  | -0.658122 | 0.00544332 |
| Gpr101        | chrX:54749844-54756934    | 0.974628 | 0.62107  | -0.650096 | 0.0467444  |
| Trpc5         | chrX:140816213-141122723  | 4.90945  | 3.14459  | -0.642687 | 0.0048142  |
| Dusp4         | chr8:35870663-35882948    | 5.68789  | 3.64713  | -0.641131 | 0.00843187 |
| Nfkbia        | chr12:56590395-56593634   | 6.48068  | 4.18225  | -0.631868 | 0.0188605  |
| Echdc2        | chr4:107838070-107851913  | 5.90923  | 3.81818  | -0.630084 | 0.0303897  |
| Thsd4         | chr9:59814737-60358842    | 4.00579  | 2.60122  | -0.622899 | 0.0122421  |
| Lct           | chr1:130181340-130224895  | 3.88027  | 2.53175  | -0.616021 | 0.00680321 |
| Penk          | chr4:4060682-4065592      | 4.68939  | 3.06657  | -0.612774 | 0.0420103  |
| Cacng5        | chr11:107735918-107776369 | 1.59932  | 1.04618  | -0.612331 | 0.0430111  |
| Kcnv1         | chr15:44937829-44946480   | 5.36968  | 3.51606  | -0.610876 | 0.00432558 |
| Cpne5         | chr17:29293465-29374735   | 1.22111  | 0.800867 | -0.608564 | 0.0478277  |
| Txnip         | chr3:96359690-96370724    | 4.73832  | 3.1117   | -0.606674 | 0.00879494 |
| Bdnf          | chr2:109514856-109567200  | 4.48723  | 2.96051  | -0.59998  | 0.0218111  |
| 2610017109Rik | chr1:42705044-42751670    | 31.7062  | 20.9551  | -0.597464 | 0.0179469  |
| Folh1         | chr7:93867485-93924374    | 2.25105  | 1.49705  | -0.588476 | 0.0463415  |
| Dtx4          | chr19:12540825-12576486   | 3.93816  | 2.61933  | -0.588323 | 0.00600868 |
| Sema5b        | chr16:35541447-35664344   | 1.5119   | 1.02376  | -0.56248  | 0.0489697  |
| Sccpdh        | chr1:181598361-181617315  | 11.5054  | 7.80112  | -0.560558 | 0.0108306  |
| Kcnk2         | chr1:191031808-191168071  | 4.22562  | 2.8727   | -0.556753 | 0.0356491  |
| Crhbp         | chr13:96201330-96214786   | 7.88049  | 5.37019  | -0.553312 | 0.0251241  |
| Hdac9         | chr12:35056361-35213754   | 4.39927  | 3.00103  | -0.551808 | 0.013059   |
| Dnahc9        | chr11:65644825-65982053   | 2.86504  | 1.95721  | -0.549763 | 0.00454048 |
| Npy           | chr6:49772727-49779504    | 24.5562  | 16.8464  | -0.543649 | 0.0394032  |
| Osbpl11       | chr16:33185156-33243398   | 3.83923  | 2.63705  | -0.54189  | 0.017013   |
| Hapln1        | chr13:89680240-89751437   | 2.20034  | 1.51317  | -0.540153 | 0.0332966  |
| Aph1b         | chr9:66623293-66643230    | 5.04744  | 3.48218  | -0.535559 | 0.0121202  |
| Gabra5        | chr7:64642641-64765379    | 29.4543  | 20.3596  | -0.53277  | 0.00448791 |
| Thrb          | chr14:18493473-18870602   | 4.857    | 3.36605  | -0.529009 | 0.0232497  |
| Slc30a3       | chr5:31388478-31395900    | 6.90414  | 4.79531  | -0.525839 | 0.0277468  |
| Galnt16       | chr8:60252848-61390424    | 3.9872   | 2.77435  | -0.523224 | 0.0208555  |
| Etv5          | chr16:22381385-22439643   | 11.2915  | 7.86449  | -0.52181  | 0.00759135 |
| Cadps2        | chr6:23212837-23789300    | 15.6575  | 10.9399  | -0.51726  | 0.00656365 |
| Lrrn1         | chr6:107479719-107520222  | 12.0193  | 8.40118  | -0.516692 | 0.00737265 |
| Me3           | chr7:96781327-97002869    | 5.47023  | 3.82366  | -0.516646 | 0.0150924  |
| Il16          | chr7:90791572-90884000    | 3.60161  | 2.5179   | -0.51642  | 0.0189709  |
| Dio2          | chr12:91962991-91976878   | 6.40356  | 4.47762  | -0.516144 | 0.00887135 |
| Nov           | chr15:54577482-54585316   | 31.7378  | 22.1973  | -0.515814 | 0.00808398 |
| C1ql3         | chr2:12845667-12932491    | 15.8289  | 11.0761  | -0.515111 | 0.00949463 |
| Tbc1d1        | chr5:64551449-64742725    | 5.78328  | 4.04786  | -0.514729 | 0.0103499  |
| Epha7         | chr4:28740294-28894649    | 27.6496  | 19.4037  | -0.510926 | 0.0291026  |
| Tle1          | chr4:71778175-71861953    | 8.66846  | 6.0887   | -0.509642 | 0.00944196 |
| Rhbdl3        | chr11:80114413-80169488   | 3.6507   | 2.57146  | -0.505586 | 0.0327547  |
| Cck           | chr9:121398941-121404807  | 160.132  | 112.835  | -0.505039 | 0.00665462 |
| Pdia6         | chr12:17273400-17331536   | 16.9865  | 12.0238  | -0.4985   | 0.0128331  |

|               |                           |         |         |           |            |
|---------------|---------------------------|---------|---------|-----------|------------|
| Bhlhe22       | chr3:17954324-17957514    | 12.2954 | 8.70445 | -0.498293 | 0.012102   |
| Fam84a        | chr12:14154403-14158844   | 15.9073 | 11.2726 | -0.496864 | 0.00910599 |
| Zfp189        | chr4:49534088-49544417    | 5.63527 | 4.00254 | -0.493568 | 0.031492   |
| Bcl6          | chr16:23965137-23988698   | 5.55681 | 3.9491  | -0.492732 | 0.027199   |
| Slc9a2        | chr1:40738556-40825730    | 5.27773 | 3.75221 | -0.492177 | 0.0301196  |
| Prmt2         | chr10:75669966-75700610   | 12.1981 | 8.71543 | -0.485017 | 0.030366   |
| Klf10         | chr15:38224167-38230462   | 4.51029 | 3.22373 | -0.484489 | 0.0442111  |
| Pkp2          | chr16:16213437-16272805   | 7.7607  | 5.55908 | -0.481341 | 0.0243749  |
| Bpnt1         | chr1:187156037-187181648  | 11.4929 | 8.23461 | -0.480975 | 0.022517   |
| Ptpn3         | chr4:57203712-57314709    | 4.90524 | 3.51559 | -0.480557 | 0.0162665  |
| Nell1         | chr7:57230719-58118659    | 8.98845 | 6.45485 | -0.47769  | 0.0232686  |
| Man2a1        | chr17:64950988-65104450   | 3.07654 | 2.20936 | -0.477681 | 0.0320852  |
| Crym          | chr7:127329897-127345502  | 64.5716 | 46.5192 | -0.473072 | 0.0156467  |
| Map3k5        | chr10:19654331-19862556   | 2.89538 | 2.09274 | -0.468362 | 0.0424926  |
| Dzip1         | chr14:119274741-119322389 | 11.6547 | 8.46878 | -0.46069  | 0.0159174  |
| Mdga1         | chr17:29964902-30024827   | 4.36127 | 3.17714 | -0.457018 | 0.0214273  |
| Dmd           | chrX:80194208-82450389    | 8.71806 | 6.36962 | -0.452799 | 0.0158251  |
| Sorcs3        | chr19:48280514-48879995   | 5.78466 | 4.24716 | -0.445735 | 0.0246887  |
| Rgnf          | chr13:98668549-98976120   | 8.21327 | 6.03368 | -0.44492  | 0.0208959  |
| Rab9b         | chrX:133392689-133403079  | 5.09577 | 3.74548 | -0.44415  | 0.0433914  |
| Plxnd1        | chr6:115904828-115945023  | 2.98285 | 2.19528 | -0.442287 | 0.042737   |
| Fosl2         | chr5:32438844-32460212    | 4.57563 | 3.3718  | -0.440452 | 0.0345557  |
| Marcks1       | chr4:129190824-129193225  | 14.919  | 10.9966 | -0.440092 | 0.0404546  |
| Fat4          | chr3:38785861-38910905    | 3.18806 | 2.3608  | -0.433403 | 0.0237824  |
| Kcnd2         | chr6:21166108-21679805    | 20.158  | 14.9346 | -0.432695 | 0.0202573  |
| 3110047P20Rik | chr5:64040341-64201782    | 2.25042 | 1.66773 | -0.432302 | 0.0479188  |
| Fibcd1        | chr2:31668809-31701525    | 16.1716 | 12.0142 | -0.42872  | 0.0238668  |
| Tsc22d3       | chrX:137074067-137135061  | 19.4604 | 14.4613 | -0.428341 | 0.0300996  |
| Bmi1          | chr2:18598644-18608256    | 7.25555 | 5.3931  | -0.42797  | 0.0424233  |
| Alcam         | chr16:52249108-52453110   | 11.7716 | 8.77328 | -0.424122 | 0.0253608  |
| Cabp7         | chr11:4638823-4646781     | 65.9221 | 49.1499 | -0.423573 | 0.0331168  |
| Slc24a3       | chr2:145068346-145467675  | 17.598  | 13.1575 | -0.419531 | 0.0268007  |
| Brd9          | chr13:74075285-74098343   | 22.171  | 16.6256 | -0.415265 | 0.0284381  |
| Zfp831        | chr2:174469034-174536331  | 3.19118 | 2.39892 | -0.411705 | 0.037483   |
| Tmem181b-ps   | chr17:6438149-6450142     | 11.2592 | 8.50423 | -0.40485  | 0.0327196  |
| Dusp6         | chr10:98725864-98730123   | 14.9285 | 11.287  | -0.403404 | 0.0387437  |
| Sst           | chr16:23889666-23890930   | 98.6986 | 74.6723 | -0.402455 | 0.0400673  |
| Dhx33         | chr11:70797592-70817934   | 7.44267 | 5.63738 | -0.400797 | 0.0391752  |
| Gpt2          | chr8:88016515-88051457    | 14.308  | 10.9544 | -0.385309 | 0.0427714  |
| Pds5b         | chr5:151476401-151613245  | 11.0559 | 8.46936 | -0.384492 | 0.0387242  |
| Iqgap2        | chr13:96397131-96661877   | 17.771  | 13.6691 | -0.37861  | 0.0468092  |
| Man1a2        | chr3:100366126-100489396  | 9.56177 | 7.36017 | -0.377539 | 0.0424597  |
| Tmem151b      | chr17:45660382-45686626   | 16.9862 | 13.0932 | -0.37555  | 0.0463895  |
| Camk4         | chr18:33098694-33355421   | 5.26318 | 6.82752 | 0.375426  | 0.044851   |
| Zbtb7a        | chr10:80599015-80614402   | 7.0601  | 9.1862  | 0.37978   | 0.0456917  |
| Camk2n1       | chr4:138011062-138016041  | 29.0944 | 37.9574 | 0.383636  | 0.0446636  |
| Plch2         | chr4:154357223-154385093  | 8.00283 | 10.4943 | 0.391021  | 0.041553   |
| Grik5         | chr7:25794869-25857388    | 14.3447 | 18.8218 | 0.39189   | 0.0376694  |
| Nr1d1         | chr11:98629248-98636556   | 12.4283 | 16.3382 | 0.394623  | 0.040967   |
| Efr3a         | chr15:65618602-65705374   | 16.3466 | 21.5091 | 0.395954  | 0.0354824  |
| Srcin1        | chr11:97370653-97436440   | 12.3338 | 16.264  | 0.399059  | 0.0343512  |
| Prrt2         | chr7:134161055-134164725  | 21.2088 | 28.0106 | 0.401309  | 0.0337754  |

|               |                           |          |         |          |            |
|---------------|---------------------------|----------|---------|----------|------------|
| Atf4          | chr15:80085613-80087971   | 15.1763  | 20.0717 | 0.403337 | 0.0418077  |
| Pde1b         | chr15:103333728-103360483 | 11.0937  | 14.6986 | 0.405935 | 0.035947   |
| Snph          | chr2:151416285-151458269  | 32.8894  | 43.7247 | 0.410826 | 0.039625   |
| Pip5k1c       | chr10:80755716-80782719   | 24.549   | 32.6385 | 0.410913 | 0.0323541  |
| Plekha6       | chr1:135142673-135200012  | 4.33733  | 5.77908 | 0.414031 | 0.0366571  |
| Hlf           | chr11:90197848-90252231   | 6.9373   | 9.25511 | 0.415876 | 0.0290813  |
| Arpp19        | chr9:74885420-74908120    | 8.92351  | 11.9076 | 0.416201 | 0.0455408  |
| Tspan5        | chr3:138405158-138567388  | 27.5241  | 36.8234 | 0.419926 | 0.0287708  |
| Ndst3         | chr3:123229083-123375310  | 5.58246  | 7.469   | 0.420016 | 0.0299559  |
| Stac2         | chr11:97897937-97914776   | 4.9718   | 6.6602  | 0.421796 | 0.0490878  |
| Kcna1         | chr6:126586480-126595819  | 13.3553  | 17.8998 | 0.422535 | 0.0292901  |
| Prosapip1     | chr2:130458574-130468539  | 18.9959  | 25.4873 | 0.424091 | 0.0257772  |
| Sncb          | chr13:54860220-54867801   | 34.1316  | 45.9179 | 0.427947 | 0.0243989  |
| Camk2g        | chr14:21554096-21613310   | 16.1573  | 21.7432 | 0.428379 | 0.0465627  |
| Al414108      | chr9:27160269-27165128    | 3.90223  | 5.26    | 0.430764 | 0.0361402  |
| Lzts1         | chr8:71659401-71664852    | 10.3352  | 13.969  | 0.434659 | 0.0364232  |
| Insig1        | chr5:28397951-28405202    | 9.34544  | 12.6531 | 0.437155 | 0.0288777  |
| Slc25a22      | chr7:148615647-148623773  | 19.8429  | 27.0289 | 0.445885 | 0.0162566  |
| Rasl11b       | chr5:74591350-74595502    | 11.0364  | 15.0737 | 0.449763 | 0.035645   |
| Hivep3        | chr4:119487282-119808016  | 1.66617  | 2.2787  | 0.45167  | 0.0321123  |
| 2900092E17Rik | chr7:134158564-134160866  | 8.57409  | 11.729  | 0.452029 | 0.0483499  |
| Fam135b       | chr15:71276107-71558268   | 8.71382  | 11.9533 | 0.456028 | 0.0159439  |
| Atp1a3        | chr7:25763187-25790914    | 113.674  | 156.093 | 0.457502 | 0.0480574  |
| Dbpht2        | chr12:75398460-75401455   | 5.37598  | 7.3954  | 0.4601   | 0.0301383  |
| Stmn4         | chr14:66963211-66980517   | 17.9997  | 24.7797 | 0.461187 | 0.0247818  |
| Gfap          | chr11:102748649-102758514 | 52.3239  | 72.1248 | 0.463024 | 0.024935   |
| Miat          | chr5:112642247-112657968  | 31.5604  | 43.7311 | 0.470542 | 0.031416   |
| Kcnj9         | chr1:174251163-174259394  | 8.06385  | 11.1971 | 0.473584 | 0.0154099  |
| Kcnj4         | chr15:79314143-79335671   | 13.5306  | 18.9588 | 0.48664  | 0.0130166  |
| Pitpnm2       | chr5:124568698-124666427  | 10.2048  | 14.3485 | 0.491652 | 0.010114   |
| Rps27         | chr3:90016588-90017570    | 180.764  | 254.854 | 0.495565 | 0.0263028  |
| Kcnh7         | chr2:62541002-63022344    | 8.86432  | 12.5768 | 0.504686 | 0.0102317  |
| 4930572J05Rik | chr15:74551663-74554803   | 6.39497  | 9.08671 | 0.506822 | 0.0393477  |
| Dot1l         | chr10:80217950-80257092   | 3.05442  | 4.35098 | 0.510441 | 0.013885   |
| Ckb           | chr12:112907565-112910549 | 274.762  | 392.07  | 0.51293  | 0.0223939  |
| Cnih3         | chr1:183282758-183390772  | 8.38351  | 11.9717 | 0.513997 | 0.0135433  |
| Eno2          | chr6:124710072-124719527  | 105.587  | 151.171 | 0.517743 | 0.0164779  |
| Myo7a         | chr7:105199569-105268003  | 0.965852 | 1.38752 | 0.522637 | 0.0414203  |
| Zfp59         | chr7:28623602-28641793    | 1.84416  | 2.653   | 0.524662 | 0.0439616  |
| Dagla         | chr19:10319754-10379367   | 10.2291  | 14.7233 | 0.525415 | 0.00793463 |
| Cdh2          | chr18:16747385-16967558   | 7.48163  | 10.7987 | 0.529431 | 0.00565348 |
| Unc5a         | chr13:55050792-55122746   | 9.03927  | 13.0893 | 0.534113 | 0.00530759 |
| Mirg          | chr12:110973190-110987667 | 5.97271  | 8.6612  | 0.536183 | 0.0385725  |
| Syt14         | chr1:194723500-194861892  | 4.0793   | 5.93706 | 0.541428 | 0.0407562  |
| Prnp          | chr2:131735663-131764167  | 120.619  | 176.821 | 0.551835 | 0.00932459 |
| Syn1          | chrX:20425668-20498044    | 17.7707  | 26.1738 | 0.558627 | 0.0421664  |
| Mapk3         | chr7:133903139-133909330  | 7.97504  | 11.7485 | 0.558908 | 0.0101809  |
| Rab26         | chr17:24665998-24670692   | 6.00033  | 8.84341 | 0.55956  | 0.0229214  |
| Fmn1          | chr2:113167892-113556924  | 2.94446  | 4.34733 | 0.562126 | 0.00410823 |
| AI593442      | chr9:52481146-52487534    | 9.73216  | 14.5733 | 0.582495 | 0.00302629 |
| Jun           | chr4:94715726-94718913    | 4.65561  | 6.98982 | 0.586286 | 0.00708759 |
| Zfyve28       | chr5:34537542-34630973    | 3.07542  | 4.62391 | 0.588328 | 0.00696741 |

|         |                           |           |           |              |            |
|---------|---------------------------|-----------|-----------|--------------|------------|
| Nefm    | chr14:68737601-68743061   | 13.4824   | 20.3949   | 0.597132     | 0.00163668 |
| Mef2d   | chr3:87946316-87973089    | 10.3083   | 15.6682   | 0.604037     | 0.002203   |
| Atp2b2  | chr6:113695661-113992074  | 39.8529   | 60.7618   | 0.608477     | 0.022366   |
| Sema7a  | chr9:57787941-57810672    | 10.0293   | 15.2931   | 0.608655     | 0.00240486 |
| Dgki    | chr6:36796021-37249976    | 13.728    | 21.1131   | 0.621018     | 0.00121406 |
| Snap25  | chr2:136539185-136608164  | 252.878   | 397.695   | 0.653221     | 0.00702273 |
| Fbxl16  | chr17:25946029-25958210   | 66.9434   | 105.368   | 0.654418     | 0.00241393 |
| Rgs4    | chr1:171671607-171677773  | 22.456    | 35.3701   | 0.655429     | 0.0005664  |
| Sox11   | chr12:28019132-28027583   | 1.27556   | 2.05702   | 0.68942      | 0.0030592  |
| Kcnip3  | chr2:127282233-127347106  | 6.31039   | 10.2385   | 0.69821      | 0.00077736 |
| Nrgn    | chr9:37352077-37360330    | 121.151   | 196.935   | 0.700917     | 0.00066019 |
| Sun2    | chr15:79554497-79572966   | 3.10094   | 5.05515   | 0.705045     | 0.0061233  |
| Flywch2 | chr17:23913884-23923044   | 4.25829   | 7.10113   | 0.737775     | 0.0413311  |
| Necab3  | chr2:154370140-154384589  | 3.1698    | 5.31482   | 0.745628     | 0.00803816 |
| Vsig2   | chr9:37346839-37351790    | 1.88551   | 3.165     | 0.747247     | 0.0475216  |
| Rbfox3  | chr11:118351073-118770886 | 10.9375   | 18.4439   | 0.753868     | 0.00032141 |
| Nlrx1   | chr9:44060795-44076682    | 0.949695  | 1.61545   | 0.7664       | 0.0398717  |
| Cdk5r2  | chr1:74901602-74904306    | 4.27739   | 7.32031   | 0.775175     | 0.00066246 |
| Dcn     | chr10:96942133-96980796   | 2.65982   | 4.56241   | 0.778466     | 0.0456805  |
| Nptx1   | chr11:119400032-119409134 | 27.1432   | 46.7112   | 0.783176     | 0.00014653 |
| Mobkl2c | chr4:115500696-115508788  | 0.633368  | 1.10244   | 0.799585     | 0.0366376  |
| Hr      | chr14:70953862-70973349   | 0.808352  | 1.49127   | 0.883483     | 0.00153054 |
| Hspb8   | chr5:116858503-116872873  | 0.681098  | 1.31367   | 0.947673     | 0.0299808  |
| Acvr1c  | chr2:58119863-58210169    | 1.13824   | 2.22939   | 0.969844     | 3.53E-05   |
| Gm10789 | chr16:90142481-90147072   | 0.175283  | 0.350522  | 0.999823     | 0.0415311  |
| Dnahc6  | chr6:72967600-73171625    | 0.193558  | 0.38861   | 1.00556      | 0.00424842 |
| Ppp1r1b | chr11:98210051-98219109   | 3.21591   | 6.8168    | 1.08387      | 8.04E-05   |
| Epor    | chr9:21763342-21768020    | 0.416917  | 0.889421  | 1.09311      | 0.0317604  |
| Scn4b   | chr9:44947124-44962144    | 2.89007   | 6.19369   | 1.0997       | 7.48E-07   |
| Gm14378 | chr8:4248213-4251423      | 0.88995   | 1.90899   | 1.10102      | 0.0269673  |
| Slc39a2 | chr14:52513284-52516420   | 0.272409  | 0.603329  | 1.14717      | 0.032628   |
| E2f1    | chr2:154385374-154395588  | 0.369127  | 0.845078  | 1.19497      | 0.0110423  |
| Gm7120  | chr13:120276063-120284312 | 4.60994   | 11.6434   | 1.33669      | 2.88E-05   |
| Ifi30   | chr8:73286671-73290562    | 0.431574  | 1.14347   | 1.40574      | 0.0244002  |
| Arsi    | chr18:61071893-61077422   | 0.173721  | 0.470781  | 1.43828      | 0.0319407  |
| Hrh3    | chr2:179834177-179838927  | 4.32203   | 13.343    | 1.6263       | 1.12E-13   |
| Icam4   | chr9:20833816-20834975    | 0.25792   | 0.810436  | 1.65177      | 0.0306275  |
| Itk     | chr11:46138651-46203017   | 0.0458805 | 0.147127  | 1.68111      | 0.029102   |
| Atf3    | chr1:192994175-193007212  | 0.0792863 | 0.27227   | 1.77989      | 0.0310844  |
| Dlk1    | chr12:110691032-110701546 | 0.0592348 | 0.205083  | 1.79169      | 0.0151163  |
| Pbld2   | chr10:62487259-62521560   | 0.0585541 | 0.209408  | 1.83847      | 0.0373499  |
| Loxhd1  | chr18:77520696-77680996   | 0.010181  | 0.0549506 | 2.43225      | 0.0321661  |
| Gm14379 | chrX:6953050-6955168      | 0.0362495 | 0.21145   | 2.54429      | 0.0246221  |
| Eps8l1  | chr7:4416343-4430844      | 0.136692  | 0.802087  | 2.55283      | 0.00302438 |
| Ccl3    | chr11:83461344-83462880   | 0         | 0.160242  | 1.79769e+308 | 0.0412881  |
| Chrdl2  | chr7:107154913-107183236  | 0         | 0.0693004 | 1.79769e+308 | 0.0418596  |
| Hba-a2  | chr11:32196488-32197310   | 0         | 2.52376   | 1.79769e+308 | 0.038652   |
| Upb1    | chr10:74869778-74902940   | 0         | 0.0739197 | 1.79769e+308 | 0.0412881  |

**Supplementary Table 2. Genes differentially expressed in the hippocampus of both *Hdac3* cKO mice and *Mecp2* KO mice**

| Downregulated genes | Upregulated genes |
|---------------------|-------------------|
| Adcyap1             | Nr1d1             |
| Wnt2                | Efr3a             |
| B4galnt3            | Plekha6           |
| Ptch2               | Hlf               |
| Spink8              | Ndst3             |
| Htr1f               | Prosapip1         |
| Wfs1                | Kcnj9             |
| Doc2b               | Rps27             |
| Htr5b               | Kcnh7             |
| Ryr1                | Fmn1              |
| Cpne9               | Dgki              |
| Glt8d2              | Rgs4              |
| Chrna5              | Kcnip3            |
| Metrn1              | Dlk1              |
| Unc13c              | Hba-a2            |
| Htr1a               |                   |
| Cdhr1               |                   |
| Lpl                 |                   |
| Tpd52l1             |                   |
| Ism1                |                   |
| Klhl13              |                   |
| Tmem158             |                   |
| Trpc5               |                   |
| Sema5b              |                   |
| Dnahc9              |                   |
| Hapln1              |                   |
| Gabra5              |                   |
| Slc30a3             |                   |
| Il16                |                   |
| Dio2                |                   |
| Rhbdl3              |                   |
| Pkp2                |                   |
| Crym                |                   |
| Plxnd1              |                   |
| 3110047P20Rik       |                   |
| Fibcd1              |                   |
| Dhx33               |                   |

**Supplementary Table 3. Genes differentially expressed in *Hdac3* cKO hippocampus and *MECP2* KO human induced neurons**

| Genes with 1.5 fold change in <i>MECP2</i> KO human neurons |                   | Genes with 1.2 fold change in <i>MECP2</i> KO human neurons |                   |
|-------------------------------------------------------------|-------------------|-------------------------------------------------------------|-------------------|
| Downregulated genes                                         | Upregulated genes | Downregulated genes                                         | Upregulated genes |
| ALOX12B                                                     | ATP2B2            | ADCYAP1                                                     | ATP2B2            |
| APH1B                                                       | C11orf87          | ALAD                                                        | C11orf87          |
| ARC                                                         | NDST3             | ALOX12B                                                     | FAM135B           |
| ARL4D                                                       | SCN4B             | APH1B                                                       | NDST3             |
| ARRDC2                                                      |                   | ARC                                                         | SCN4B             |
| B2M                                                         |                   | ARL4D                                                       | SOX11             |
| BPNT1                                                       |                   | ARRDC2                                                      |                   |
| CD109                                                       |                   | B2M                                                         |                   |
| CLDN1                                                       |                   | BCL6                                                        |                   |
| DDIT4L                                                      |                   | BPNT1                                                       |                   |
| DHX33                                                       |                   | BRD9                                                        |                   |
| DMD                                                         |                   | C1QL3                                                       |                   |
| DUSP5                                                       |                   | CABP7                                                       |                   |
| ETV5                                                        |                   | CACNG5                                                      |                   |
| FOS                                                         |                   | CCK                                                         |                   |
| FOSL2                                                       |                   | CD109                                                       |                   |
| GBP2                                                        |                   | CDH24                                                       |                   |
| HDAC9                                                       |                   | CLDN1                                                       |                   |
| HLA-A                                                       |                   | CPNE9                                                       |                   |
| IQGAP2                                                      |                   | CRYM                                                        |                   |
| KLF10                                                       |                   | DDIT4L                                                      |                   |
| MAN1A2                                                      |                   | DHX33                                                       |                   |
| MAN2A1                                                      |                   | DMD                                                         |                   |
| METRNL                                                      |                   | DTX4                                                        |                   |
| NFKBIA                                                      |                   | DUSP4                                                       |                   |
| NOV                                                         |                   | DUSP5                                                       |                   |
| NR4A1                                                       |                   | ECHDC2                                                      |                   |
| OLFML2B                                                     |                   | ETV5                                                        |                   |
| PDIA6                                                       |                   | FAM84B                                                      |                   |
| PLXND1                                                      |                   | FIBCD1                                                      |                   |
| PRMT2                                                       |                   | FOS                                                         |                   |
| PTPN3                                                       |                   | FOSL2                                                       |                   |
| SCCPDH                                                      |                   | GBP2                                                        |                   |
| SEMA5B                                                      |                   | GLT8D2                                                      |                   |
| SGK1                                                        |                   | GPR101                                                      |                   |
| SST                                                         |                   | GPT2                                                        |                   |
| THSD4                                                       |                   | HAPLN1                                                      |                   |
| TLE1                                                        |                   | HDAC9                                                       |                   |
| TSC22D3                                                     |                   | HLA-A                                                       |                   |
| TXNIP                                                       |                   | IQGAP2                                                      |                   |
| WFS1                                                        |                   | KLF10                                                       |                   |
|                                                             |                   | KRT12                                                       |                   |



|  |  |                                                                                                                                                                                                                                                                                                                                                                      |  |
|--|--|----------------------------------------------------------------------------------------------------------------------------------------------------------------------------------------------------------------------------------------------------------------------------------------------------------------------------------------------------------------------|--|
|  |  | LPL<br>MAN1A2<br>MAN2A1<br>MARCKSL1<br>METRNL<br>NFKBIA<br>NLRC5<br>NOV<br>NR4A1<br>OLFML2B<br>OSBPL11<br>PDIA6<br>PDS5B<br>PLCZ1<br>PLIN4<br>PLXND1<br>PRMT2<br>PTPN3<br>RAB9B<br>SCCPDH<br>SEMA5B<br>SGK1<br>SLC17A6<br>SST<br>STBD1<br>TBC1D1<br>THBS4<br>THRB<br>THSD4<br>TLE1<br>TPD52L1<br>TSC22D3<br>TTLL10<br>TXNIP<br>UCP2<br>WFS1<br>WNT2<br>XDH<br>ZNF189 |  |
|--|--|----------------------------------------------------------------------------------------------------------------------------------------------------------------------------------------------------------------------------------------------------------------------------------------------------------------------------------------------------------------------|--|

**Supplementary Table 4. Summary of MeCP2 KO models used in this study**

| <b>Figure</b>         | <b>MeCP2 KO Model</b> | <b>Species</b> | <b>Age</b> | <b>Reference</b>        |
|-----------------------|-----------------------|----------------|------------|-------------------------|
| Fig. 2f               | Hippocampus           | mouse          | 9-weeks    | Baker et al. 2013       |
| Fig. 2g               | Induced neurons       | human          | 4-weeks    | Li et al 2013           |
| Supplementary Fig. 6b | Hippocampus           | mouse          | 9-weeks    | Baker et al. 2013       |
| Supplementary Fig. 6b | Hippocampus           | mouse          | 9-weeks    | Baker et al. 2013       |
| Supplementary Fig. 7a | Hippocampus           | mouse          | 9-weeks    | Baker et al. 2013       |
| Supplementary Fig. 7a | Hypothalamus          | mouse          | 6-weeks    | Chahrour et al. 2008    |
| Supplementary Fig. 7a | Cerebellum            | mouse          | 6-weeks    | Ben-Shachar et al. 2009 |
